# Supplementary material for: Identifying Blood Biomarkers for Dementia Using Machine Learning Methods in the Framingham Heart Study
Source: MDPI journal article supplement (doi:10.3390/cells11091506), 2022-04-30
Supplement: s1 [file s1]

**Table S1.** Performance of machine learning models under different sensitivity cutoffs

| Sensitivity | SVM         |           |          | ANN         |           |          | XGB         |           |          |
|-------------|-------------|-----------|----------|-------------|-----------|----------|-------------|-----------|----------|
|             | Specificity | Precision | Accuracy | Specificity | Precision | Accuracy | Specificity | Precision | Accuracy |
| 10.0%       | 97.1%       | 37.8%     | 84.2%    | 97.7%       | 43.2%     | 84.7%    | 97.5%       | 41.0%     | 84.5%    |
| 25.0%       | 91.4%       | 33.4%     | 81.5%    | 94.6%       | 44.4%     | 84.3%    | 92.7%       | 37.3%     | 82.7%    |
| 50.0%       | 78.7%       | 29.0%     | 74.5%    | 82.1%       | 32.7%     | 77.4%    | 82.5%       | 33.2%     | 77.7%    |
| 75.0%       | 62.1%       | 25.6%     | 64.0%    | 60.0%       | 24.6%     | 62.3%    | 64.8%       | 27.0%     | 66.3%    |
| 90.0%       | 37.2%       | 19.9%     | 45.0%    | 37.9%       | 20.1%     | 45.6%    | 40.9%       | 20.9%     | 48.2%    |
